# Supplementary material
Source: PubMed Central journal article supplement (PMC3604624)
Supplement: NIHMS51681-supplement-01.pdf [file NIHMS51681-supplement-01.pdf]

## Online Supplement

### **PREECLAMPSIA IS ASSOCIATED WITH COMPROMISED MATERNAL SYNTHESIS OF LONG CHAIN POLYUNSATURATED FATTY ACIDS LEADING TO OFFSPRING DEFICIENCY**

Vanessa A Mackay, Shahzya S Huda, Frances M Stewart, Kahmeng Tham, Louise A McKenna, Iain Martin, Fiona Jordan\*, E Ann Brown\*, Leanne Hodson†, Ian A Greer, Barbara J Meyer‡, Dilys J Freeman\*.

School of Medicine, \*Institute of Cardiovascular and Medical Sciences, University of Glasgow, Glasgow, UK, †Oxford Centre for Diabetes, Endocrinology and Metabolism, University of Oxford, Oxford, UK, ‡School of Health Sciences, Metabolic Research Centre, University of Wollongong, Wollongong, NSW, Australia

Short Title: PUFA status in healthy & complicated pregnancy

Corresponding author: Dr Dilys Freeman  
Institute of Cardiovascular and Medical Sciences  
McGregor Building Level 2,  
University of Glasgow, Glasgow, G12 8QQ, UK  
E-mail: [dilys.freeman@glasgow.ac.uk](mailto:dilys.freeman@glasgow.ac.uk)  
Tel: +44 141 211 2785  
Fax: +44 141 211 2012

## Methods

### *Subjects*

Blood pressure measurements were taken at all routine antenatal visits by a midwife using an automated sphygmomanometer (A&D digital BP machine) in the left arm in a seated position. Urinalysis was initially screened using a combiscreen dipstick (Analyticon Biotechnologies) and if abnormal on visual screening confirmed on dipstick reader (Combiscan 100, Analyticon Biotechnologies). For women recruited just prior to undergoing Caesarean section, pre-operative blood pressure was taken using a Dinamap® (GE Healthcare) in the left arm with women in a semi-recumbent position and repeat urinalysis was not performed if a recent measurement in clinic had been negative. In PE women, third trimester blood pressure measurements were taken in the left arm in semi-recumbent position using a Dinamap®. PE was defined according to the ISSHP criteria i.e. recruitment of a patient with PE required a reading of diastolic blood pressure >110 mmHg on one occasion, or >90 mmHg on repeated readings and being normotensive at booking. In addition, urinalysis on dipstick, using the method described above, was greater or equal to 2+ proteinuria on at least one occasion in the absence of renal disease or infection, with minimal or no proteinuria on previous urinalysis. Women were classified as having severe PE according to the Hypertension in Pregnancy NICE clinical guideline 107 i.e. a diastolic blood pressure of 110mmHg or greater, and/or a systolic blood pressure 160mmHg or greater. Twenty-one of the PE mothers were classified as having severe PE and samples were available from 9 babies from a severe PE pregnancy. IUGR was defined as an estimated fetal weight <5<sup>th</sup> percentile for gestation with associated oligohydramnios (amniotic fluid index <5) and/or abnormal umbilical artery blood flow on Doppler ultrasound. Four women with PE also had IUGR and were included in the PE group only. Multiparous pregnancies were excluded. None of the women had a medical history of metabolic disease or had suspected fetal anomalies likely to contribute to reduced fetal growth. Subject characteristics were recorded at time of sampling. Delivery details were recorded from patient notes. Deprivation category (DEPCAT score), a measure of socioeconomic status, was assigned using the Scottish Area Deprivation Index for Scottish postcode sectors, 1998<sup>1</sup>. Customised birth weight centiles were calculated using the Gestation Network Centile Calculator 5.4 ([http://www.gestation.net/birthweight\\_centiles/centile\\_online.htm](http://www.gestation.net/birthweight_centiles/centile_online.htm)). Non-fasting venous blood was collected from non-labouring mothers. Plasma was harvested at 5°C by low speed centrifugation within 30 minutes of collection and plasma and erythrocytes stored at -80°C. Placental biopsies were collected at delivery. Subcutaneous adipose tissue was obtained at Caesarean section from under the skin on entry into the abdomen and visceral adipose tissue was obtained from the omentum following closure of the uterus and haemostasis. Biopsies were flash frozen in liquid nitrogen and stored at -80°C until analyzed.

### *Plasma metabolites*

Plasma NEFA was quantitated by colorimetric assay (Wako, Alpha Laboratories, Eastleigh, UK). Insulin quantitation was performed by ELISA (Mercodia, Sweden) according to the manufacturer's instructions. HOMA was calculated as follows: [fasting insulin (mU/L) x fasting glucose (mmol/L)]/22.5. Plasma leptin, adiponectin, IL-6 and TNF $\alpha$  were assayed by ELISA (R&D Systems, Abingdon, UK).

### *Fatty acid compositions*

Erythrocyte membranes were collected as described previously<sup>2</sup>. An 11µm thick cryosection of adipose tissue was extracted by washing with 1mL chloroform:methanol (2:1 vol/vol) and made up to a final volume of 5 ml. Fatty acid extracts were prepared by modified Folch extraction and derivatised<sup>2, 3</sup>. Methyl fatty acids were separated, identified and quantitated by gas chromatography<sup>2, 4</sup>. Identification of fatty acid methyl esters was made by comparison with authentic standard mixtures (Fatty acid methyl ester mixture #189-19, L9405, Sigma, Sweden). Inclusion of heneicosanoic acid or pentadecanoic acid (0.2mg/ml toluene) during extraction allowed quantitation of fatty acid absolute concentrations.

### *Messenger RNA expression*

Total RNA was isolated from placental and adipose tissue using the ABI PRISM 6100 Nucleic Acid Prepstation following manufacturer's instructions (Applied Biosystems, Warrington, UK). cDNA was reverse transcribed from RNA using a High Capacity cDNA Reverse Transcriptase Kit (Applied Biosystems). Target gene expression was quantitated relative to a control gene (*TOP1* Hs00243257\_m1 placenta<sup>5</sup> and *PPIA* Hs99999904\_m1 adipose tissue<sup>6</sup>) using commercial primer probe sets (*FADS1* Hs00203685\_m1, *FADS2* Hs00188654\_m1, *SCD* Hs01682761\_m1, *ELOVL2* Hs00214936\_m1, *ELOVL6* Hs00225412\_m1, *GOT2* Hs00905827\_g1 and *FABP7* Hs00361426\_m1 Applied Biosystems) in a final volume of 25µl on an 7900HT Sequence Detection System (Applied Biosystems). The expression of target assays were normalised by subtracting the C<sub>T</sub> value of the endogenous control from the C<sub>T</sub> value of the target assay. The fold increase relative to the control was calculated using the formula  $2^{-\Delta CT}$  and expressed as a percentage. Fold increase data was square root or log transformed to achieve a normal distribution before statistical analysis.

### *Statistical analysis*

Normality testing used the Ryan-Joiner test and, where necessary, data were transformed to log or square root values to achieve normality. *ELOVL2* expression was undetectable in the entire PE group and non-parametric analysis used. Chi squared test was used to test for differences among groups for categorical and ANOVA or Kruskal-Wallis for continuous variables. *Post hoc* comparison between groups was by Tukey-Kramer test or by comparison of proportions of detectable expression by Fisher's exact test. Multivariate analysis was carried out using the General Linear Model. Statistical analysis was carried out using Minitab (Vs 15.1) or JMP 7.

## Abbreviations

12:0 lauric acid; 14:0 myristic acid, 16:0 palmitic acid; 18:0 stearic acid; 20:0 arachidic acid; 22:0 behenic acid; 24:0 lignoceric acid; 16:1n-7, palmitoleic acid; 18:1n-9 oleic acid; 20:1n-9 eicosenoic acid, 22:1n-9 erucic acid; 24:1n-9 nervonic acid; 18:2n-6 linoleic acid; 18:3n-6 gamma-linolenic acid; 20:3n-6 dihomo-gamma-linolenic acid; 20:4n-6 arachidonic acid; 22:4n-6 adrenic acid; 22:5n-6 docosapentaenoic acid; 18:3n-3 alpha-linolenic acid; 20:3n-3 eicosatrienoic acid; 20:5n-3 eicosapentaenoic acid; 22:5n-3 docosapentaenoic acid; 22:6n-3 docosahexaenoic acid (DHA); n-9 omega-9 monounsaturated fatty acids; n-7 omega-7 monounsaturated fatty acids; n-6 omega-6 polyunsaturated fatty acids; n-3 omega-3 polyunsaturated fatty acids; BMI body mass index; C20-22 fatty acids with carbon chain length of 20 to 22 carbons; CRP C reactive protein; DEPCAT Deprivation score which is a measure of socio-economic status; HDL high density lipoprotein; HOMA homeostasis model of assessment; ISSHP International Society for the Study of Hypertension in Pregnancy; IUGR intrauterine growth restriction; LC long chain; MUFA monounsaturated fatty acids; NEFA non-esterified fatty acids; PE preeclampsia; pFABPpm placental plasma membrane fatty acid binding protein; PUFA polyunsaturated fatty acid; SAFA saturated fatty acid; SCD stearyl CoA desaturase; SHBG steroid hormone binding globulin.

## References

1. Carstairs V, Morris R. Deprivation and mortality: an alternative to social class? *Community Med.* 1989;11:210-219.
2. Stewart F, Rodie VA, Ramsay JE, Greer IA, Freeman DJ, Meyer BJ. Longitudinal assessment of erythrocyte fatty acid composition throughout pregnancy and post partum. *Lipids.* 2007;42:335-344.
3. Folch J, Lees M, Sloane Stanley GH. A simple method for the isolation and purification of total lipids from animal tissues. *J Biol Chem.* 1957;226:497-509.
4. Evans K, Burdge GC, Wootton SA, Clark ML, Frayn KN. Regulation of dietary fatty acid entrapment in subcutaneous adipose tissue and skeletal muscle. *Diabetes.* 2002;51:2684-2690.
5. Cleal JK, Day P, Hanson MA, Lewis RM. Measurement of housekeeping genes in human placenta. *Placenta.* 2009;30:1002-1003.
6. Neville MJ, Collins JM, Gloyn AL, McCarthy MI, Karpe F. Comprehensive human adipose tissue mRNA and microRNA endogenous control selection for quantitative real-time-PCR normalization. *Obesity (Silver Spring).* 2011;19:888-892.

**Table S1. Maternal antenatal booking characteristics for Control, preeclampsia (PE) and intrauterine growth restriction (IUGR) mothers.** Values are mean and standard deviation (SD) for continuous variables or number (%) for categorical variables. ANOVA\* was used to test for differences among groups (†on log transformed data). Chi squared test was used to test for differences among groups for categorical variables. Different superscript letters indicate differences between individual groups using *post hoc* Tukey-Kramer test or subgroup chi-squared test. Significance level P<0.005.

| Maternal Parameter               | Control<br>(n=164)       | PE<br>(n=62)             | IUGR<br>(n=23)          | P*     |
|----------------------------------|--------------------------|--------------------------|-------------------------|--------|
| <b><i>Demographic data</i></b>   |                          |                          |                         |        |
| BMI†<br>(kg/m <sup>2</sup> )     | 27.8 (5.9)               | 27.8 (5.5)               | 24.5 (4.9)              | 0.021  |
| Age<br>(years)                   | 29.6 (5.6)               | 29.1 (6.3)               | 29.4 (5.4)              | 0.83   |
| DEPCAT Score                     | 4.8 (1.8)                | 4.4 (1.8)                | 5.3 (1.8)               | 0.11   |
| Primigravidae<br>(n, %)          | 83 (50.3)                | 43 (69.4)                | 12 (52.2)               | 0.039  |
| Smokers<br>(n, %)                | 43 (26.1) <sup>a</sup>   | 6 (9.8) <sup>b</sup>     | 13 (56.5) <sup>c</sup>  | <0.001 |
| Sampling gestation<br>(weeks)    | 37.4 (2.9)               | 36.3 (3.2)               | 36.1 (2.9)              | 0.028  |
| Systolic BP†<br>(mmHg)           | 120 (14) <sup>a</sup>    | 152 (19) <sup>b</sup>    | 107 (10) <sup>a</sup>   | <0.001 |
| Diastolic BP†<br>(mmHg)          | 71 (9) <sup>a</sup>      | 95 (11) <sup>b</sup>     | 71 (7) <sup>a</sup>     | <0.001 |
| Gestation at delivery<br>(weeks) | 39.8 (1.4) <sup>a</sup>  | 36.7 (3.0) <sup>b</sup>  | 36.5 (3.1) <sup>b</sup> | <0.001 |
| Birth weight<br>(g)              | 3575 (552) <sup>a</sup>  | 2563 (799) <sup>b</sup>  | 2018 (565) <sup>c</sup> | <0.001 |
| Birth weight centile             | 56.2 (31.6) <sup>a</sup> | 24.1 (27.7) <sup>b</sup> | 2.0 (3.2) <sup>c</sup>  | <0.001 |

**Table S2. Maternal third trimester plasma and cord plasma metabolic and inflammatory markers for Control, preeclampsia (PE) and intrauterine growth restriction (IUGR) pregnancies.** Values are mean and standard deviation (SD) for continuous variables or number (%) for categorical variables. ANOVA\* was used to test for differences among (†on log transformed or ‡ square root transformed data). Different superscript letters indicate differences between individual groups using *post hoc* Tukey-Kramer test or subgroup chi-squared test. Significance level P<0.005. ‡adjusted for maternal body mass index (BMI), parity, smoking status and gestational age at sampling (for mothers) or gestational age at delivery (for offspring).

| Biochemical Parameter       | Control                  | PE                       | IUGR                       | P*     | §Adjusted P |
|-----------------------------|--------------------------|--------------------------|----------------------------|--------|-------------|
| <b>Maternal plasma (n)</b>  | n=164                    | n=62                     | n=23                       |        |             |
| Total cholesterol (mmol/L)  | 6.16 (1.08)              | 6.62 (1.17)              | 6.27 (1.01)                | 0.022  | 0.010       |
| Triglyceride† (mmol/L)      | 2.78 (0.99) <sup>a</sup> | 3.36 (1.01) <sup>b</sup> | 2.63 (1.06) <sup>a</sup>   | <0.001 | <0.001      |
| HDL cholesterol† (mmol/L)   | 1.61 (0.38)              | 1.66 (0.46)              | 1.70 (0.45)                | 0.63   | 0.20        |
| NEFA† (mmol/L)              | 0.34 (0.20) <sup>a</sup> | 0.51 (0.23) <sup>b</sup> | 0.52 (0.50) <sup>a,b</sup> | <0.001 | <0.001      |
| Leptin† (mg/mL)             | 37 (26) <sup>a</sup>     | 58 (33) <sup>b</sup>     | 34 (27) <sup>a</sup>       | 0.001  | 0.002       |
| Adiponectin† (ug/mL)        | 8.3 (3.2) <sup>a</sup>   | 10.7 (4.7) <sup>b</sup>  | 8.5 (3.3) <sup>a,b</sup>   | 0.002  | <0.001      |
| IL-6† (pg/mL)               | 2.6 (1.6) <sup>a</sup>   | 4.7 (4.8) <sup>b</sup>   | 2.7 (1.8) <sup>a</sup>     | 0.001  | <0.001      |
| TNFα† (pg/mL)               | 1.96 (2.02)              | 1.71 (0.93)              | 3.44 (5.28)                | 0.11   | 0.62        |
| CRP† (mg/L)                 | 5.50 (4.81)              | 7.44 (11.28)             | 5.36 (3.89)                | 0.99   | 0.98        |
| <b>Cord blood (n)</b>       | n=85                     | n=21                     | n=13                       | P*     | §Adjusted P |
| Total cholesterol† (mmol/L) | 1.62 (0.47) <sup>a</sup> | 2.27 (0.68) <sup>b</sup> | 1.22 (0.32) <sup>c</sup>   | <0.001 | <0.001      |
| Triglyceride† (mmol/L)      | 0.45 (0.39) <sup>a</sup> | 0.58 (0.07) <sup>b</sup> | 0.59 (0.22) <sup>b</sup>   | 0.004  | 0.003       |
| HDL cholesterol† (mmol/L)   | 0.78 (0.25) <sup>a</sup> | 0.81 (0.30) <sup>a</sup> | 0.44 (0.17) <sup>b</sup>   | <0.001 | <0.001      |
| NEFA† (mmol/L)              | 0.13 (0.10)              | 0.14 (0.09)              | 0.15 (0.14)                | 0.36   | 0.37        |
| Glucose† (mmol/L)           | 4.31 (1.23)              | 4.57 (0.97)              | 4.48 (1.28)                | 0.47   | 0.68        |
| Insulin‡ (mU/L)             | 8.2 (12.3)               | 10.2 (15.7)              | 5.5 (9.3)                  | 0.058  | 0.14        |
| HOMA†                       | 1.7 (3.7)                | 2.2 (3.5)                | 1.1 (1.7)                  | 0.17   | 0.10        |
| Leptin† (mg/mL)             | 13.1 (14.3) <sup>a</sup> | 7.1 (6.8) <sup>b</sup>   | 4.2 (6.2) <sup>b</sup>     | <0.001 | 0.57        |
| Adiponectin (ug/mL)         | 0.93 (0.41) <sup>a</sup> | 0.58 (0.59) <sup>b</sup> | 0.37 (0.44) <sup>b</sup>   | <0.001 | 0.23        |
| IL-6† (pg/mL)               | 6.74 (8.44)              | 6.79 (5.86)              | 6.68 (5.68)                | 0.42   | 0.66        |
| TNFα† (pg/mL)               | 2.31 (1.26)              | 1.90 (0.60)              | 2.57 (0.76)                | 0.063  | 0.15        |
| CRP ‡ (mg/L)                | 0.27 (1.06)              | 0.11 (0.08)              | 0.05 (0.06)                | 0.14   | 0.26        |

**Table S3. Maternal antenatal booking characteristics and third trimester plasma metabolic and inflammatory markers and maternal erythrocyte fatty acid concentrations (nmol/mL blood) for Control, mild preeclampsia (PE) and severe PE mothers.** Values are mean and standard deviation (SD) for continuous variables or number (%) for categorical variables. ANOVA\* was used to test for differences among groups (†on log transformed data). Chi squared test was used to test for differences among groups for categorical variables. Different superscript letters indicate differences between individual groups using *post hoc* Tukey-Kramer test or subgroup chi-squared test. Significance level P<0.005.

| Maternal Parameter           | Control<br>(n=164)       | Mild PE<br>(n=38)        | Severe PE<br>(n=21)        | P*     |
|------------------------------|--------------------------|--------------------------|----------------------------|--------|
| <b>Demographic data</b>      |                          |                          |                            |        |
| BMI (kg/m <sup>2</sup> )     | 27.8 (5.9)               | 28.0 (5.4)               | 27.4 (5.8)                 | 0.89   |
| Smokers (n, %)               | 43 (26.1) <sup>a</sup>   | 2 (5.3) <sup>b</sup>     | 4 (23.8) <sup>a,b</sup>    | 0.004  |
| Systolic BP† (mmHg)          | 120 (14) <sup>a</sup>    | 142 (13) <sup>b</sup>    | 171 (12) <sup>c</sup>      | <0.001 |
| Diastolic BP† (mmHg)         | 71 (9) <sup>a</sup>      | 91 (10) <sup>b</sup>     | 103 (9) <sup>c</sup>       | <0.001 |
| Gestation at delivery(weeks) | 39.8 (1.4) <sup>a</sup>  | 37.2 (2.9) <sup>b</sup>  | 36.1 (3.2) <sup>b</sup>    | <0.001 |
| Birth weight (g)             | 3575 (552) <sup>a</sup>  | 2702 (816) <sup>b</sup>  | 2377 (703) <sup>b</sup>    | <0.001 |
| Birth weight centile         | 56.2 (31.6) <sup>a</sup> | 29.1 (32.1) <sup>b</sup> | 16.3 (15.2) <sup>b</sup>   | <0.001 |
| <b>Biochemical data</b>      |                          |                          |                            |        |
| Triglyceride† (mmol/L)       | 2.78 (0.99) <sup>a</sup> | 3.38 (1.00) <sup>b</sup> | 3.19 (0.88) <sup>a,b</sup> | <0.001 |
| NEFA† (mmol/L)               | 0.34 (0.20) <sup>a</sup> | 0.53 (0.26) <sup>b</sup> | 0.54 (0.19) <sup>b</sup>   | <0.001 |
| Leptin† (mg/mL)              | 37 (26) <sup>a</sup>     | 61 (33) <sup>b</sup>     | 51 (32) <sup>a,b</sup>     | <0.001 |
| Adiponectin† (ug/mL)         | 8.3 (3.2) <sup>a</sup>   | 10.6 (4.9) <sup>b</sup>  | 10.9 (4.6) <sup>b</sup>    | 0.003  |
| IL-6† (pg/mL)                | 2.6 (1.6) <sup>a</sup>   | 3.9 (2.6) <sup>b</sup>   | 5.5 (6.3) <sup>b</sup>     | 0.002  |
| <b>Fatty Acid</b>            |                          |                          |                            |        |
| <b>SAFA</b>                  |                          |                          |                            |        |
| 22:0                         | 22 (14) <sup>a</sup>     | 24 (14) <sup>a</sup>     | 9 (15) <sup>b</sup>        | <0.001 |
| <b>PUFA n-6</b>              |                          |                          |                            |        |
| 18:2n-6                      | 171 (54) <sup>a</sup>    | 141 (52) <sup>b</sup>    | 110 (47) <sup>b</sup>      | <0.001 |
| 20:2n-6                      | 4 (5) <sup>a</sup>       | 2 (3) <sup>b</sup>       | 2 (3) <sup>b</sup>         | <0.001 |
| 20:3n-6                      | 32 (15) <sup>a</sup>     | 25 (14) <sup>b</sup>     | 18 (14) <sup>b</sup>       | <0.001 |
| 20:4n-6                      | 225 (89) <sup>a</sup>    | 161 (99) <sup>b</sup>    | 102 (81) <sup>c</sup>      | <0.001 |
| 22:4n-6                      | 43 (20) <sup>a</sup>     | 31 (20) <sup>b</sup>     | 18 (17) <sup>c</sup>       | <0.001 |
| 22:5n-6                      | 10 (6) <sup>a</sup>      | 6 (6) <sup>b</sup>       | 3 (4) <sup>b</sup>         | <0.001 |
| <b>PUFA n-3</b>              |                          |                          |                            |        |
| 22:5n-3                      | 32 (14) <sup>a</sup>     | 22 (15) <sup>b</sup>     | 12 (10) <sup>c</sup>       | <0.001 |
| 22:6n-3                      | 65 (30) <sup>a</sup>     | 48 (38) <sup>b</sup>     | 25 (25) <sup>c</sup>       | <0.001 |
| <b>Summary indices</b>       |                          |                          |                            |        |
| % SAFA                       | 49 (7) <sup>a</sup>      | 53 (9) <sup>b</sup>      | 58 (7) <sup>c</sup>        | <0.001 |
| % MUFA                       | 21 (2) <sup>a</sup>      | 23 (2) <sup>b</sup>      | 23 (2) <sup>b</sup>        | <0.001 |
| % PUFA                       | 30 (7) <sup>a</sup>      | 24 (9) <sup>b</sup>      | 18 (8) <sup>c</sup>        | <0.001 |
| % UNSAT                      | 51 (7) <sup>a</sup>      | 47 (9) <sup>b</sup>      | 42 (7) <sup>c</sup>        | <0.001 |
| UI                           | 131 (29) <sup>a</sup>    | 109 (35) <sup>b</sup>    | 87 (29) <sup>c</sup>       | <0.001 |
| Av CL                        | 18.5 (0.3) <sup>a</sup>  | 18.3 (0.3) <sup>b</sup>  | 18.1 (0.3) <sup>c</sup>    | <0.001 |
| C 20-22                      | 26 (6) <sup>a</sup>      | 22 (7) <sup>b</sup>      | 17 (6) <sup>c</sup>        | <0.001 |



|                      |                          |                          |                          |        |
|----------------------|--------------------------|--------------------------|--------------------------|--------|
| DHA deficiency index | 0.20 (0.11) <sup>a</sup> | 0.15 (0.15) <sup>b</sup> | 0.09 (0.17) <sup>b</sup> | <0.001 |
| EFA deficiency index | 1.44 (0.39) <sup>a</sup> | 1.06 (0.42) <sup>b</sup> | 0.81 (0.39) <sup>b</sup> | <0.001 |

---

**Table S4. Fatty acid composition (mol% of total fatty acids) and summary indices in subcutaneous adipose tissue from Control, preeclampsia (PE) and intrauterine growth restriction (IUGR) mothers biopsied at delivery.**

All values are mean and standard deviation (SD). ANOVA\* was used to test for differences among groups (†on log transformed where appropriate). Lipogenic index is represented by 18:2n-6/16:0.

| Fatty acid                       | Control<br>n=28 | PE<br>n=13    | IUGR<br>n=5 | *P    |
|----------------------------------|-----------------|---------------|-------------|-------|
| <i>Mol% of Total Fatty Acids</i> |                 |               |             |       |
| <b>SAFA</b>                      |                 |               |             |       |
| 12:0                             | 0.58 (0.44)     | 0.45 (0.21)   | 0.66 (0.22) | 0.45  |
| 14:0                             | 2.98 (0.64)     | 2.89 (0.50)   | 3.00 (0.76) | 0.88  |
| 16:0                             | 24.0 (1.7)      | 23.7 (1.8)    | 23.3 (2.2)  | 0.67  |
| 18:0                             | 3.63 (0.84)     | 3.18 (0.76)   | 3.71 (0.48) | 0.21  |
| 20:0                             | 0.12 (0.05)     | 0.13 (0.05)   | 0.16 (0.04) | 0.27  |
| <b>MUFA</b>                      |                 |               |             |       |
| 14:1n-7                          | 0.12 (0.14)     | 0.09 (0.09)   | 0.16 (0.14) | 0.52  |
| 16:1n-7                          | 5.21 (1.19)     | 5.56 (1.15)   | 5.60 (0.95) | 0.61  |
| 18:1n-7                          | 1.92 (0.50)     | 1.84 (0.27)   | 1.39 (0.71) | 0.073 |
| 18:1n-9                          | 47.2 (2.5)      | 47.9 (2.9)    | 48.1 (2.7)  | 0.65  |
| 20:1n-9                          | 0.61(0.35)      | 0.60 (0.35)   | 0.78 (0.19) | 0.56  |
| <b>PUFA n-6</b>                  |                 |               |             |       |
| 18:2n-6                          | 12.1 (2.2)      | 12.2 (2.2)    | 11.8 (1.8)  | 0.93  |
| 18:3n-6                          | 0.08 (0.04)     | 0.11 (0.03)   | 0.10 (0.03) | 0.069 |
| 20:3n-6                          | 0.18 (0.07)     | 0.20 (0.12)   | 0.10 (0.04) | 0.093 |
| 20:4n-6                          | 0.26 (0.06)     | 0.27 (0.10)   | 0.25 (0.05) | 0.89  |
| <b>PUFA n-3</b>                  |                 |               |             |       |
| 18:3n-3                          | 0.89 (0.28)     | 0.90 (0.22)   | 0.86 (0.11) | 0.95  |
| 20:5n-3                          | 0.01 (0.01)     | 0.01 (0.02)   | 0.02 (0.02) | 0.45  |
| 22:5n-3                          | 0.005 (0.017)   | 0.017 (0.040) | 0.00 (0.00) | 0.30  |
| 22:6n-3                          | 0.01 (0.03)     | 0.02 (0.04)   | 0.03 (0.06) | 0.54  |
| <b>Summary Indices</b>           |                 |               |             |       |
| % SAFA                           | 31.3 (3.0)      | 30.3 (2.4)    | 30.9 (3.2)  | 0.56  |
| % MUFA                           | 55.1 (3.1)      | 56.0 (3.7)    | 56.0 (2.2)  | 0.65  |
| % PUFA†                          | 13.6 (2.3)      | 13.7 (2.4)    | 13.1 (1.9)  | 0.89  |
| % UNSAT                          | 68.7 (3.0)      | 69.7 (2.4)    | 69.1 (3.2)  | 0.56  |
| % n-6 PUFA†                      | 12.7 (2.2)      | 12.8 (2.3)    | 12.2 (1.9)  | 0.90  |
| % n-3 PUFA                       | 0.91 (0.28)     | 0.95 (0.23)   | 0.90 (0.10) | 0.88  |
| n-6/n-3 ratio                    | 16.4 (12.9)     | 13.9 (2.9)    | 13.6 (1.8)  | 0.71  |
| Lipogenic Index                  | 0.51 (0.11)     | 0.52 (0.10)   | 0.51 (0.12) | 0.98  |

**Table S5. Fatty acid composition (mol% of total fatty acids) and summary indices in visceral adipose tissue from Control, preeclampsia (PE) and intrauterine growth restriction (IUGR) mothers biopsied at delivery.**

All values are mean and standard deviation (SD). ANOVA\* was used to test for differences among groups (†on log transformed where appropriate). Different superscript letters indicate differences between individual groups using *post hoc* Tukey-Kramer test. Lipogenic index is represented by 18:2n-6/16:0.

| Fatty acid                       | Control<br>n=26            | PE<br>n=13               | IUGR<br>n=5              | *P    |
|----------------------------------|----------------------------|--------------------------|--------------------------|-------|
| <i>Mol% of total fatty acids</i> |                            |                          |                          |       |
| <b>SAFA</b>                      |                            |                          |                          |       |
| 12:0                             | 0.56 (0.13) <sup>a</sup>   | 0.52 (0.13) <sup>a</sup> | 0.87 (0.38) <sup>b</sup> | 0.001 |
| 14:0                             | 3.22 (0.61)                | 2.99 (0.61)              | 3.49 (1.00)              | 0.34  |
| 16:0                             | 23.1 (1.7)                 | 22.7 (1.9)               | 24.2 (3.3)               | 0.37  |
| 18:0                             | 4.46 (0.83) <sup>a,b</sup> | 3.90 (0.95) <sup>a</sup> | 5.07 (0.86) <sup>b</sup> | 0.036 |
| 20:0                             | 0.27 (0.06)                | 0.23 (0.07)              | 0.29 (0.06)              | 0.099 |
| <b>MUFA</b>                      |                            |                          |                          |       |
| 14:1n-7                          | 0.22 (0.18)                | 0.25 (0.20)              | 0.11 (0.11)              | 0.34  |
| 16:1n-7                          | 5.32 (1.01)                | 5.58 (1.24)              | 4.94 (0.71)              | 0.51  |
| 18:1n-7                          | 0.75 (0.82)                | 0.99 (0.87)              | 0.71 (0.78)              | 0.50  |
| 18:1n-9                          | 47.6 (3.4)                 | 48.2 (34.0)              | 46.5 (3.8)               | 0.69  |
| 20:1n-9                          | 0.81 (0.36)                | 0.83 (0.30)              | 0.84 (0.08)              | 0.98  |
| <b>PUFA n-6</b>                  |                            |                          |                          |       |
| 18:2n-6                          | 12.3 (2.2)                 | 12.3 (2.6)               | 11.9 (1.6)               | 0.91  |
| 18:3n-6                          | 0.06 (0.03)                | 0.08 (0.03)              | 0.07 (0.02)              | 0.44  |
| 20:3n-6                          | 0.12 (0.05)                | 0.16 (0.05)              | 0.11 (0.06)              | 0.047 |
| 20:4n-6                          | 0.231 (0.07)               | 0.24 (0.12)              | 0.19 (0.06)              | 0.60  |
| <b>PUFA n-3</b>                  |                            |                          |                          |       |
| 18:3n-3                          | 0.84 (0.25)                | 0.81 (0.23)              | 0.70 (0.20)              | 0.48  |
| 20:5n-3                          | 0.04 (0.04)                | 0.04 (0.06)              | 0.04 (0.04)              | 0.57  |
| 22:5n-3                          | 0.05 (0.05)                | 0.06 (0.07)              | 0.03 (0.06)              | 0.49  |
| 22:6n-3                          | 0.02 (0.04)                | 0.02 (0.04)              | 0.03 (0.07)              | 0.82  |
| <b>Summary Indices</b>           |                            |                          |                          |       |
| % SAFA                           | 31.6 (2.8)                 | 30.4 (2.9)               | 33.9 (5.4)               | 0.11  |
| % MUFA                           | 55.1 (3.1)                 | 55.9 (4.1)               | 53.1 (4.2)               | 0.37  |
| % PUFA†                          | 13.6 (2.2)                 | 13.8 (2.7)               | 13.0 (1.7)               | 0.85  |
| % UNSAT                          | 68.4 (2.8)                 | 69.6 (2.9)               | 66.1 (5.4)               | 0.11  |
| % n-6 PUFA†                      | 12.7 (2.1)                 | 12.8 (2.6)               | 12.2 (1.7)               | 0.88  |
| % n-3 PUFA                       | 0.95 (0.27)                | 0.95 (0.19)              | 0.80 (0.25)              | 0.44  |
| n-6/n-3 ratio                    | 14.5 (5.0)                 | 13.9 (3.5)               | 16.8 (6.0)               | 0.49  |
| Lipogenic Index                  | 0.54 (0.10)                | 0.55 (0.13)              | 0.50 (0.14)              | 0.78  |

**Figure S1**

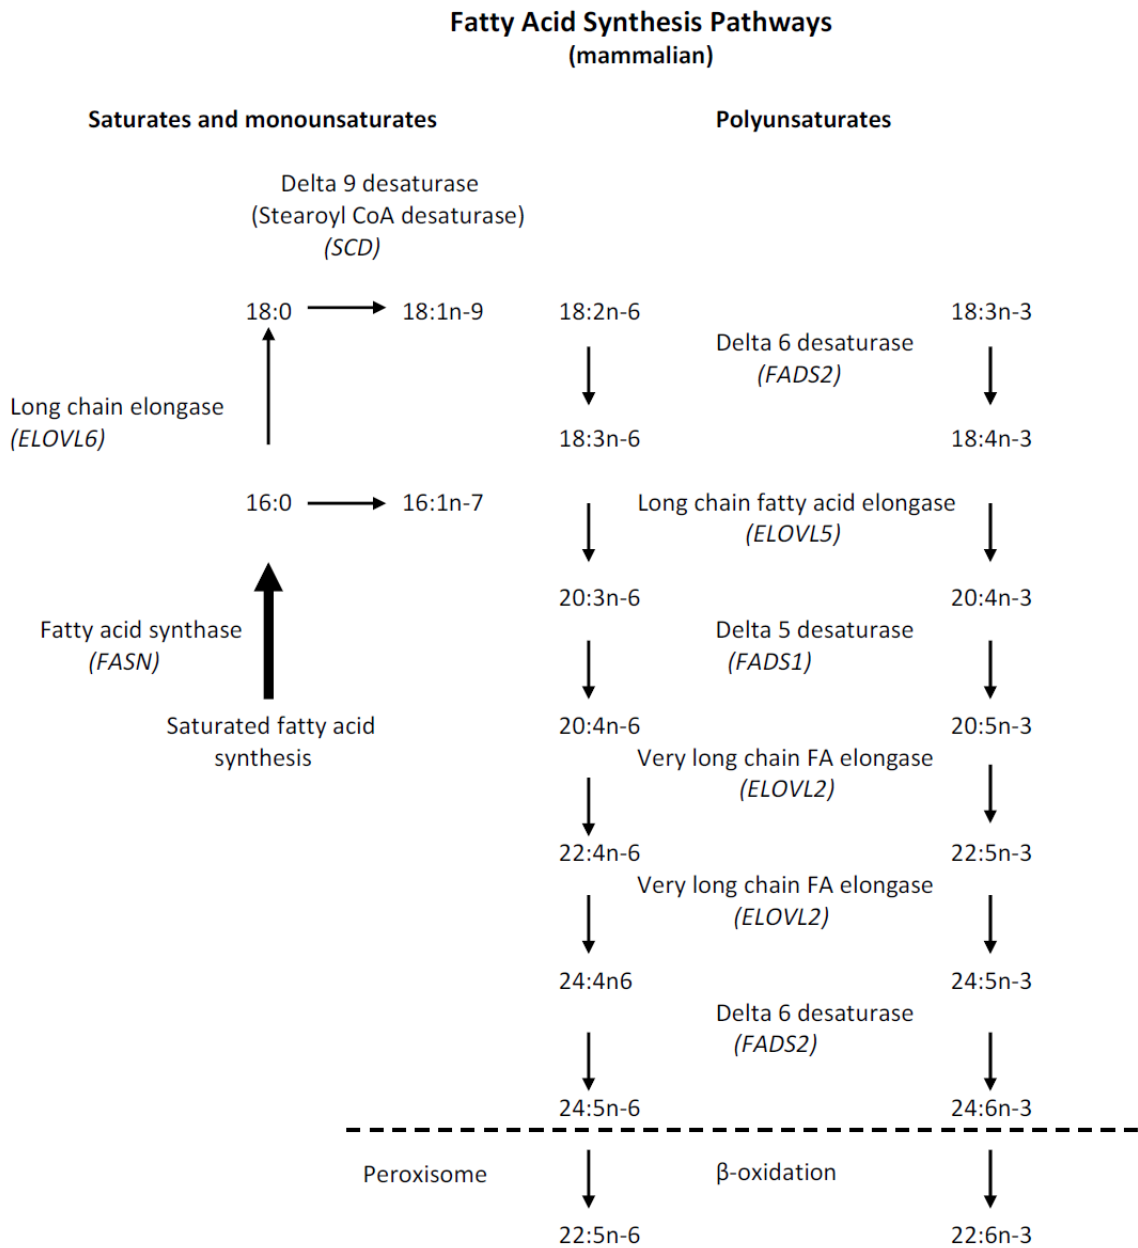

**Figure S1. Mammalian fatty acid synthesis pathways.** Mammalians can synthesize saturated and monounsaturated fatty acids. The substrates for long chain polyunsaturated fatty acid (LC PUFA) synthesis, 18:2n-6 and 18:3n-3 cannot be made by mammals and required to be derived from the diet. The n-6 LC PUFA and n-3 LC PUFA biosynthetic pathways are carried out in parallel and share the same elongase and desaturase enzymes.

Figure S2

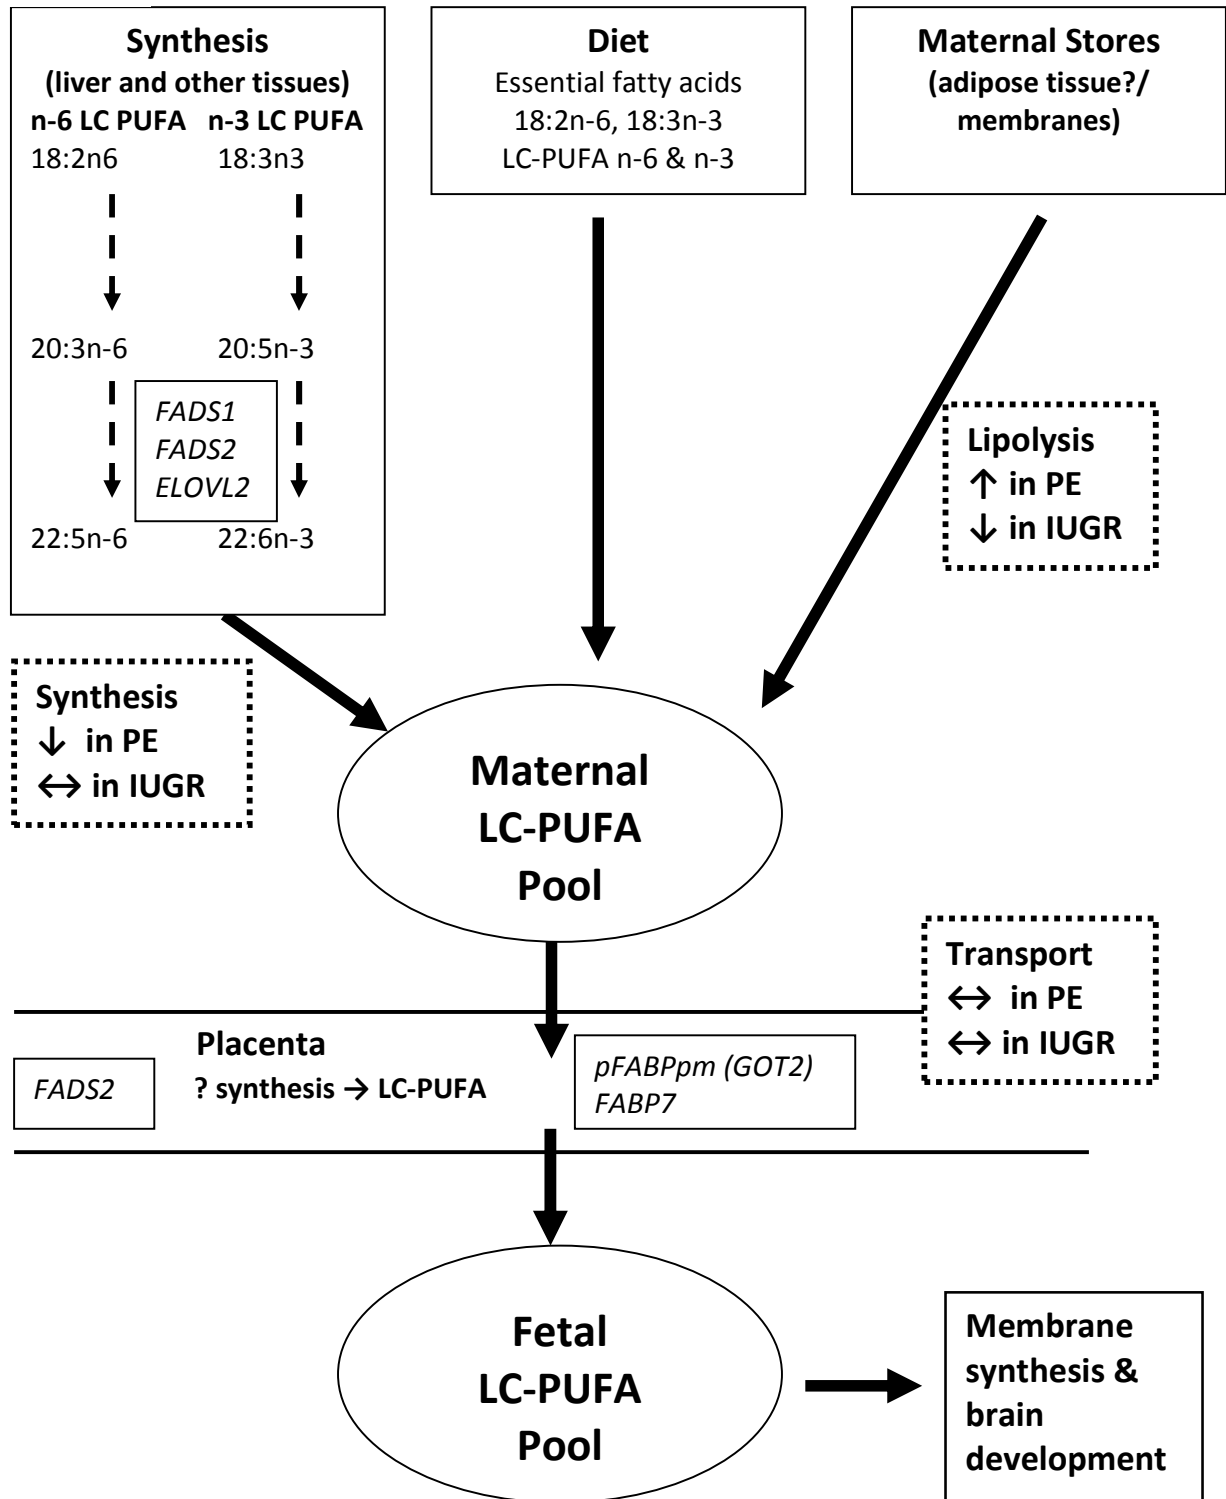

**Figure S2. Long chain polyunsaturated fatty acid metabolism (LC PUFA) metabolism in preeclampsia (PE) and intrauterine growth restriction (IUGR) pregnancy.** Sources that contribute to the maternal circulating LC PUFA pool include *de novo* synthesis from shorter chain essential fatty acid precursors in the liver and other tissues, dietary intake and release from maternal stores via lipolysis. Others have shown that lipolysis is increased in PE and reduced in IUGR. We provide evidence that LC PUFA synthesis is decreased in PE via reduced *FADS1*, *FADS2* and *ELOVL2* expression. LC PUFA are transported across the placenta and together with LC PUFA that might be synthesised *de novo* in the placenta contribute to the fetal LC PUFA pool. We observed no difference in the mRNA expression of placental transport proteins specific for 22:6n3 between control and PE or IUGR pregnancies. The fetus requires LC PUFA for the synthesis of membranes and brain development.
